# Supplementary material for: Synthetic gene expression perturbation systems with rapid, tunable, single-gene specificity in yeast
Source: PubMed Central journal article supplement — Nucleic Acids Res. 2012 Dec 25;41(4):e57. doi: 10.1093/nar/gks1313 (PMC3575806; doi:10.1093/nar/gks1313), 2012-12-25
Supplement: supp_gks1313_nar-02741-h-2012-File002.pdf [file supp_gks1313_nar-02741-h-2012-File002.pdf]

## Supplementary Information

### **Synthetic gene expression perturbation systems with rapid, tunable single-gene specificity in yeast**

*R. Scott McIsaac<sup>1,2,\*†</sup>, Benjamin L. Oakes<sup>1,\*</sup>, Xin Wang<sup>1,3</sup>  
Krysta A. Dummit<sup>1</sup>, David Botstein<sup>1,3</sup>, Marcus L. Noyes<sup>1,†</sup>*

<sup>1</sup>The Lewis-Sigler Institute for Integrative Genomics, Princeton University, Princeton, NJ 08544, USA.

<sup>2</sup>Graduate Program in Quantitative and Computational Biology, Princeton University, Princeton, NJ 08544, USA.

<sup>3</sup>Department of Molecular Biology, Princeton University, Princeton, NJ 08544, USA.

† To whom correspondence may be addressed: [rmcisaac@princeton.edu](mailto:rmcisaac@princeton.edu),  
[mnoyes@princeton.edu](mailto:mnoyes@princeton.edu)

## Synthetic promoters

We used the *GAL1* promoter as a template of the synthetic promoters driving expression of a target gene by  $Z_4$ EV, GEV, and  $Z_3$ EV. The modified *GAL1* promoter with modified UAS<sub>GAL</sub> region highlighted in green and Xba1 and Not1 restriction sites in red is shown below. The 3 CGG-N<sub>11</sub>-GCC sequences are underlined.

>Modified *GAL1* promoter

```
TTATATTGAATTTTCAAAAATTCTTACTTTTTTTTTTTGGATGGACGCAAAGAAGTTTAATAATCATATTACA
TGGCATTACCACCATATACATATCCATATCTAATCTTACTTATATGTTGTGGAAATGTAAAGAGCCCCATT
ATCTTAGCCTAAAAAACCTTCTCTTTGGAACCTTTCAGTAATACGCTTAACTGCTCATTGCTATATTGAAG
TGGGCCGCGAAGCCGCCGAGCGGGCAGCCCTCCGACGGAAGACTCTAGACCGTGCGTCCTCGTCT
TCACCGGTCGCGTTTCTGAAACGCAGATGTGCCTCGCGCCGCACTGCTCCGAACAATAAAGATTCTACAAT
ACTAGCTTTTTATGGTTATGAAGAGGAAAAATTGGCAGTAACCTGGCCCCACAAACCTTCAAATTAACGAAT
CAAATTAACAACCATAGGATGATAATGCGATTAGTTTTTTAGCCTTATTTCTGGGGTAATTAATCAGCGAA
GCGATGATTTTTGATCTATTAACAGATATATAAATGGAAAAGCTGCATAACCACTTTAACTAATACTTTCA
ACATTTTCAGTTTGTATTACTTCTTATTCAAATGTCATAAAAAGTATCAACAAAAAATTGTTAATATACCTC
TATACTTTAACGTCAAGGAGAAAAAACTATA
```

In  $Z_4$ EVpr, the Xba1-Sequence-Not1 region was replaced by the following sequence where the  $Z_4$ EV binding sequence GCGGCGGAGGAG is underlined:

```
GCGGCCGCGGCGGAGGAGTGCGGCGGAGGAGGAGGAGGAGGAGTGCGGCCGAGGAGGAGCGGCGGAGGA
GTGCGGCGGAGGAGTCTAGA
```

In the  $Z_3$ EVpr, the Xba1-Sequence-Not1 region was replaced by the following sequence where the  $Z_3$ EV binding sequence GCGTGGGCG is underlined.

```
GCGGCCGCGTGGGCGTGCGTGGGCGGGCGTGGGCGTGGGCGTGGGCGTGGGCGTGGGCGTGGGCGTCTAGA
```

As written above, the optimal Zif268 binding sequence is GCGTGGGCG. The non-canonical binding sites (in order of decreasing strength) are GCGTGGGTG, GCGTGGGAG, GCGTGGGGCC, and GCGTGGGGG.

## Artificial Transcription Factors

The sequences of GEV,  $Z_4$ EV, and  $Z_3$ EV are shown below. The DNA binding domains are shown in red; the estrogen receptor is in green; VP16 is in blue. The linker between the Gal4dbd and ER is highlighted in pink and yellow.

>GEV

```
ATGAAGCTACTGTCTTCTATCGAACAAGCATGCGATATTTGCCGACTTAAAAAGCTCAAGTGTCCAAAGA
AAAACCGAAGTGCGCCAAGTGTCTGAAGAACAACCTGGGAGTGTGCTACTCTCCCAAACCAAAGGTCTC
CGCTGACTAGGGCACATCTGACAGAAGTGAATCAAGGCTAGAAAGACTGGAACAGCTATTTCTACTGATT
TTTTCTCGAGAAGACCTTGACATGATTTTGAATAATGGATTCTTTACAGGATATAAAAGCATTGTTA ggtag
ccctgcagctgctgctgactctagaggatcca tctgctggagacatgagagctgccaacctttggccaagcc
cgctcatgatcaaacgctcttaagaagaacagcctggccttgctccctgacggccgaccagatggctcagtgcc
ttgttggatgctgagccccccatactctattccgagatgatcctaccagacccttcagtgaagcttcgat
gatgggcttactgaccaacctggcagacagggagctgggttcacatgatcaactgggccaagaggggtgccag
gctttgtggatttgacctccatgatcaggtccacctctagaaatgtgctcctggctagagatcctgatgat
ggctcctgctggcctccatggagcaccagtgaaagctactgtttgctcctaaactgctctggacaggaa
ccagggaaaaatggttagagggcatgggtggagatcttcgacatgctgctggctacatcatctcgggtccgca
tgatgaaatctgcagggagaggagttgtgtgctcctcaaatctattatcttggcttaattctggagtgtacaca
tttctgtccagcaccctgaagtctctggaagagaaggaccataccaccgagctcctggacaagatcacaga
cactttgatccacctgatggccaaggcaggcctgacctgcagcagcagcaccagcggctggcccagctcc
tctcatcctctcccacatcagggacatgagtaacaaaggcatggagcatctgtacagcatgaagtgaag
aacgtgggtgccccctctatgacctgctgctggagatgctggacgccccaccgctacatgcccacttagccg
tggaggggcatccgtggaggagacggaccacaaagccacttggccactgcccggctctacttcatcggagctcc
```

acttagacggcgaggacgtggcgatggcgcatgccgacgcgctagacgatttcgatctggacatggtgggggacgggggattccccggggcggggatttccccccacgactccgccccctacggcgctctgggata tggcgcacttcgagtttgagcagatggtttaccgatgcccttgggaattgacgagtagcggtag

>Z<sub>4</sub>EV

ATGGGTACCCGCCCATATGCTTGCCCTGTTCGAGTCCTGCGATCGCCGCTTTTCTCGCCACGCCAATCTTACCGCCATATCCGCATCCATAACCGGTGAGAAGCCCTTCCAGTGTGGAATCTGCATGCGTAACTTCAGTCGTAATGCGAACCTTGTGCGCCACATCCGCACCCACACAGGATCCCAAAGCCGTTCCAATGTTCGGATCTGTATGCGGAACCTTGTGCGAAAGGCCGACCTGAGGCGTCACATTTCGCACGCACACCGGGGAGAAGCCTTTTGCCTGTGACATTTGTGGGAGGAAGTTTGCCAGGAAGGGCGACCTCAAGAGGCATACCAAATCCATACAGGTGGCGGAGGCACACCTGCAGCTGCGTTCGACTCTAGAGGATCCA tctgctgggagacatgagagctgccaacctttggccaagcccgcctcatgatcaaacgctcctaagaagaacagcctggccttgtccctgacggccgaccagatggtcagtgcccttgttggatgctgagccccccatactctattccgagtagatgacccaccagacccttcagtgaagcttcgatgatgggcttactgaccaacctggcagacagggagctgggttcacatgatcaactgggccaagagggtgccagggcttgtggatgtgacctccatgatcaggtccacctctagaaatgtgcccggctagagatcctacagatggctctgctggcgcctccatggcgcctccatggagcaccagtgtagagggcatgggtggagatcttcgacatgctgctggctacatcatctcggttccgcatgatgaatctgcagggagaggagtttgtgtgctccaaatctattatcttggcttaattctggaggtacacacattctgtccagcaccctgaagtctctggaagagaaggaccataccaccaggtcctggacaagatcacagacactttgatccacctgatggccaaggcaggcctgacctgcagcagcagcaccagcggctggccagctcctcctcatcctctcccacatcaggcacaatgagtaacaaaggcatggagcatctgtacagcatgaaatgtgcaagaacgtgggtgccccctctatgacctgctgctggagatgctggacgcccaccgctacatgcccactagccgtggaggggcatccgtggaggagacggaccaaagccacttggccaactgcccgtctacttcatcgagctccacttagacggcgaggacgtggcgatggcgcatgccgacgcgctagacgatttcgatctggacatggtgggggacgggggattccccggggcggggatttccccccacgactccgccccctacggcgctctgggata tggcgacttcgagtttgagcagatggtttaccgatgcccttgggaattgacgagtagcggtag

> Z<sub>3</sub>EV

ATGGGTACCCGCCCATATGCTTGCCCTGTTCGAGTCCTGCGATCGCCGCTTTTCTCGCTCGGATGAGCTTACCGCCATATCCGCATCCATAACCGGTGAGAAGCCCTTCCAGTGTGGAATCTGCATGCGTAACTTCAGTCGTAATGACACCTTACCACCCACATCCGCACCCACACAGGCGAGAAGCCTTTTGCCTGTGACATTTGTGGGAGGAAGTTTGCCAGGAGTGATGAACGCAAGAGGCATACCAAATCCATACAGGTGGCGGAGGCACACCTGCAGCTGCGTTCGACTCTAGAGGATCCA tctgctgggagacatgagagctgccaacctttggccaagcccgcctcatgatacaaacgctcctaagaagaacagcctggccttgtccctgacggccgaccagatggtcagtgcccttgttggatgctgagccccccatactctattccgagtagatgacccaccagacccttcagtgaagcttcgatgatgggcttactgaccaacctggcagacagggagctgggttcacatgatcaactgggccaagagggtgccagggcttgtggatgtgacctccatgatcaggtccacctctagaaatgtgcccggctagagatcctgatgattggctctcgtctggcgcctccatggagcaccagtgaaagctactggttgcctccaaatctattatcttggcttaattctggaggtgtacacattctgtccagcaccctgaagtctctggaagagaaggaccataccaccaggtcctggacaagatcacagacactttgatccacctgatggccaaggcaggcctgacctgcagcagcagcaccagcggctggcccagctcctcctcatcctcccacatcaggcacaatgagtaacaaaggcatggagcatctgtacagcatgaaatgtgcaagaacgtgggtgccccctctatgacctgctgctggagatgctggacgcccaccgctacatgcccactagccgtggaggggcatccgtggaggagacggaccaaagccacttggccaactgcccgtctacttcatcgagctccacttagacggcgaggacgtggcgatggcgatgccgacgcgctagacgatttcgatctggacatggtgggggacggggattccccggggcggggatttccccccacgactccgccccctacggcgctctgggata tggcgacttcgagtttgagcagatggtttaccgatgcccttgggaattgacgagtagcggtag

## Plasmid sequences for pMN9, KanMX-ZEV promoter template

>pMN9

```
CTAAATTGTAAGCGTTAATATTTTTGTTAAAATTCGCGTTAAATTTTTGTTAAATCAGCTCATTTTTTTAACC
AATAGGCCGAAATCGGCAAAATCCCTTATAAATCAAAGAATAGACCGAGATAGGGTTGAGTGTGGTTCCA
GTTTGGAAACAAGAGTCCACTATTAAGAACGTGGACTCCAACGTCAAAGGGCGAAAAACCGTCTATCAGGG
CGATGGCCCACTACGTGAACCATCACCTAATCAAGTTTTTTGGGGTCGAGGTGCCGTAAAGCACTAAATC
GGAACCCTAAAGGGAGCCCCGATTTAGAGCTTGACGGGGAAAGCCGGCGAACGTGGCGAGAAAGGAAGGG
AAGAAAGCGAAAGGAGCGGGCGTAGGGCGTGGCAAGTGTAGCGGTACGCTGCGCGTAACCACCACACC
CGCCGCGCTTAATGCGCCGCTACAGGGCGCGTCCCATTGCGCATTAGGCTGCGCAACTGTTGGGAAGGGC
GATCGGTGCGGGCCTCTTCGCTATTACGCCAGCTGGCGAAAGGGGGATGTGCTGCAAGGCGATTAAGTTGG
GTAACGCCAGGGTTTTCCAGTCACGACGTTGTTAAAACGACGGCCAGTGAGCGCGCGTAATACGACTCACT
ATAGGGCGAATTGGGTACGATCGATCCGGCCGCCGGAGGGTTGCGTTTGGAGACGGGCGACAGATCCAGTCG
CGCTGCTCTCGTCGATCCGACGTCCATACTAGTGGTACCTATAGTTTTTTCTCCTTGACGTTAAAGTATAG
AGGTATATTAACAATTTTTTGTGATACTTTTATGACATTTGAATAAGAAGTAATACAACTGAAAATGTT
GAAAGTATTAGTTAAAGTGGTTATGCAGCTTTTTCCATTTATATATCTGTTAATAGATCAAAAATCATCGCT
TCGCTGATTAATTACCCAGAAATAAGGCTAAAAAACTAATCGCATTATCATCCTATGGTTGTTAATTTGA
TTGTTAATTTGAAGTTTTGTGGGGCCAGGTTACTGCCAATTTTTCTCTTCATAACCATAAAAAGCTAGTA
TTGTAGAATCTTTATTGTTTCGGAGCAGTGC GGCGCGAGGCACATCTGCGTTTCAGGAACGCGACCGGTGAA
GACGAGGACGCACGGTCTAGACGCCCACGCACGCCCACGCCCGCCCACGCACGCCCACGCCCGCCCACGCA
CGCCCCACGCGGCGCACTTCAATATAGCAATGAGCAGTAAAGCGTATTACTGAAAGTCCAAAGAGAAGGT
TTTTTTAGGCTAAGATAATGGGGCTCTTTACATTTCCACAACATATAAGTAAGATTAGATGGATGATGTA
TATGGATATGTATATGGTGGTAATGCCATGTAATATGATTATTAAACTTCTTTGCGTCCATCAAAAAAAA
AGTAAGAATTTTTGAAAATTCATATAAAGATCTGTTTAGCTTGCCTCGTCCCCGCCGGGTACCCCGCCA
GCGACATGGAGGCCCAGAATACCCTCCTTGACAGTCTTGACGTGCGCAGCTCAGGGGCATGATGTGACTGT
CGCCCGTACATTTAGCCCATACATCCCATGTATAATCATTGTCATCCATACATTTTGATGGCCGCACGGC
GCGAAGCAAAAATTACGGCTCCTCGCTGCAGACCTGCGAGCAGGGAAACGCTCCCCTCACAGACGCGTTGA
ATTGTCCCACGCCGCGCCCTGTAGAGAAATATAAAAGGTTAGGATTTGCCACTGAGGTTCTTCTTTTCAT
ATACTTCTTTTTAAAATCTTGCTAGGATACAGTTCTCACATCACATCCGAACATAAAACAACCATGGGTAAG
GAAAAGACTCACGTTTCGAGGCCGCGATTAAATCCAACATGGATGCTGATTTATATGGGTATAAATGGGC
TCGCGATAATGTGGGCAATCAGGTGCGACAATCTATCGATTGTATGGGAAGCCCAGTGCGCCAGAGTTGT
TTCTGAAACATGGCAAAGGTAGCGTTGCCAATGATGTTACAGATGAGATGGTCAGACTAAACTGGCTGACG
GAATTTATGCCTCTTCCGACCATCAAGCATTATCCGTACTCCTGATGATGCATGGTTACTCACCCTGC
GATCCCCGGCAAAACAGCATTCCAGGTATTAGAAGATATCCTGATTGAGGTGAAAATATTGTTGATGCGC
TGGCAGTGTCTCGCGCGGTTGCACTTCGATTCTGTTTGTAAATTTGTCCTTTTAAACAGCAGTTCGCGTATTT
CGTCTCGCTCAGGCGCAATCACGAATGAATAACGGTTTTGGTTGATGCGAGTGATTTTATGACGAGCGTAA
TGGCTGGCCTGTTGAAACAAGTCTGGAAAGAAATGCATAAGCTTTTTGCCATTCTCACCCGATTGATGTCGTA
CTCATGGTGATTTCTCACTTGATAACCTTATTTTTGACGAGGGGAAATTAATAGGTTGTATTGATGTTGGA
CGAGTCGGAATCGCAGACCGGATACCAGGATCTTGCCATCCTATGGAACTGCCTCGGTGAGTTTTCTCCTTC
ATTACAGAAACGGCTTTTTCAAAAATATGGTATTGATAATCCTGATATGAATAAATTGCAGTTTCATTTGA
TGCTCGATGAGTTTTTCTAATCAGTACTGACAATAAAAAGATTCTTGTTTTCAAGAACTTGTGATTTGTAT
AGTTTTTTTTATATTGTAGTTGTTCTATTTTAAATCAAATGTTAGCGTGATTTATATTTTTTTTTCGCCTCGAC
ATCATCTGCCCAGATGCGAAGTTAAGTGCAGCAAGTAATATCATGCGTCAATCGTATGTGAATGCTGGT
CGCTATACTGCTGTGATTCGATACTAACGCCGCCATCCAGTTTAAACGAGCTCGAATTCGGTGCAGCGG
ATCGAGCAGTGTGATCACTACTGGACCGCGAGCTGTGCTGCGACCCGTGATATGCAGCTCCAGCTTTTGT
TCCCTTTAGTGAGGGTTAATTGCGCGCTTGGCGTAATCATGGTCATAGCTGTTTCTGTGTGAAATTGTTA
TCCGCTCACAAATTCACACAACATACGAGCCGGAAGCATAAAGTGTAAAGCCTGGGGTGCCTAATGAGTGA
GCTAACTCACATTAATTGCGTTGCGCTCACTGCCCGCTTTCCAGTCGGGAAACCTGTGCGTGCAGCTGCAT
TAATGAATCGGCCAACGCGCGGGGAGAGGCGGTTTTGCGTATTGGGCGCTCTTCCGCTTCTCGCTCACTGA
CTCGCTGCGCTCGGTCGTTCCGGCTGCGGCGAGCGGTATCAGCTCACTCAAAGGCGGTAATACGGTTATCCA
CAGAATCAGGGGATAACGCAGGAAAGAACATGTGAGCAAAAGGCCAGCAAAAGGCCAGGAACCGTAAAAAG
GCCGCGTTGCTGGCGTTTTTCCATAGGCTCCGCCCCCTGACGAGCATCACAAAATCGACGCTCAAGTCA
GAGGTGGCGAAACCCGACAGGACTATAAAGATACCAGGCGTTTTCCCCTGGAAGCTCCCTCGTGCCTCTC
CTGTTCCGACCTGCGCTTACCAGGATACCTGTCCGCCTTTCTCCTTCCGGGAAGCGTGGCGCTTTCTCAT
AGCTCACGCTGTAGGTATCTCAGTTCCGGTGTAGGTCGTTCCGCTCCAAGCTGGGCTGTGTGCACGAACCC
CGTTCCAGCCCGACCGCTGCGCCTTATCCGGTAACTATCGTCTTGAGTCCAACCCGGTAAGACACGACTTAT
CGCCACTGGCAGCAGCCACTGGTAACAGGATTAGCAGAGCGAGGTATGTAGGCGGTGCTACAGAGTTCTTG
```

AAGTGGTGGCCTAACTACGGCTACACTAGAAAGGACAGTATTTGGTATCTGCGCTCTGCTGAAGCCAGTTAC  
CTTCGGAAAAAGAGTTGGTAGCTCTTGATCCGGCAAACAAACCACCGCTGGTAGCGGTGGTTTTTTTTGTTT  
GCAAGCAGCAGATTACGCGCAGAAAAAAGGATCTCAAGAAGATCCTTTGATCTTTTCTACGGGGTCTGAC  
GCTCAGTGGAACGAAAACTCACGTTAAGGGATTTTTGGTCATGAGATTATCAAAAAGGATCTTCACCTAGAT  
CCTTTTAAATTAATAAATGAAGTTTTAAATCAATCTAAAGTATATATGAGTAAACTTGGTCTGACAGTTACC  
AATGCTTAATCAGTGAGGCACCTATCTCAGCGATCTGTCTATTTTCGTTTCATCCATAGTTGCCTGACTCCCC  
GTCGTGTAGATAACTACGATACGGGAGGGCTTACCATCTGGCCCCAGTGCTGCAATGATACCGCGAGACCC  
ACGCTCACCGGCTCCAGATTTATCAGCAATAAACCCAGCCAGCCGGAAGGGCCGAGCGCAGAAGTGGTCTTG  
CAACTTTATCCGCCTCCATCCAGTCTATTAATTGTTGCCGGAAGCTAGAGTAAGTAGTTCCGCGAGTTAAT  
AGTTTTGCGCAACGTTGTTGCCATTGCTACAGGCATCGTGGTGTACGCTCGTCTGTTTGGTATGGCTTCATT  
CAGCTCCGGTTCCCAACGATCAAGGCGAGTTACATGATCCCCATGTTGTGCAAAAAAGCGGTTAGCTCCT  
TCGGTCTCCGATCGTTGTGAGAAGTAAGTTGGCCGAGTGTATCACTCATGGTTATGGCAGCACTGCAT  
AATTCTCTTACTGTCATGCCATCCGTAAGATGCTTTTTCTGTGACTGGTGAGTACTCAACCAAGTCATTCTG  
AGAATAGTGTATGCGGCGACCGAGTTGCTCTTGCCCGGCGTCAATACGGGATAATACCGCGCCACATAGCA  
GAACCTTAAAGTGTCTCATATTGAAAACGTTCTTCGGGGCGAAAACTCTCAAGGATCTTACCGCTGTTG  
AGATCAGTTTCGATGTAACCACTCGTGCACCAACTGATCTTCAGCATCTTTTACTTTTACCAGCGTTTC  
TGGGTGAGCAAAAAACAGGAAGGCAAAATGCCGCAAAAAAGGGAATAAGGGCGCACCGGAAATGTTGAATAC  
TCATACTCTTCTTTTTCAATATTATTGAAGCATTATCAGGGTTATTGTCTCATGAGCGGATAACATATTT  
GAATGTATTTAGAAAAATAACAAATAGGGGTTCCGCGCACATTTCCCCGAAAAAGTGCCAC

### Plasmid sequences for pMN10, KanMX-ZEV promoter template

#### pMN10

CTAAATTGTAAGCGTTAATATTTTTGTTAAATTCGCGTTAAATTTTTGTTAAATCAGCTCATTTTTTAAACC  
AATAGGCCGAAATCGGCAAAATCCCTTATAAATCAAAAGAATAGACCGAGATAGGGTTGAGTGTGTTCCCA  
GTTTGGAAACAAGAGTCCACTATTAAGAAGCTGGACTCCAACGTCAAAGGGCGAAAAACCGTCTATCAGGG  
CGATGGCCCACTACGTGAACCATCACCTAATCAAGTTTTTTGGGGTTCGAGGTGCCGTAAGCACTAAATC  
GGAACCTAAAGGGAGCCCCGATTTAGAGCTTGACGGGGAAAGCCGGCGAACGTGGCGAGAAAGGAAGGG  
AAGAAAGCGAAAGGAGCGGGCGCTAGGGCGCTGGCAAGTGTAGCGGTACGCTGCGCGTAACCACCACACC  
CGCCGCGCTTAATGCGCCGCTACAGGGCGCGTCCCATTCCGCATTTCAGGCTGCGCAACTGTTGGGAAGGGC  
GATCGGTGCGGGCCTCTTCGCTATTACGCCAGCTGGCGAAAGGGGGATGTGCTGCAAGGCGATTAAGTTGG  
GTAACGCCAGGGTTTTCCAGTCACGACGTTGTA AAAACGACGGCCAGTGAGCGCGCGTAATACGACTCACT  
ATAGGGCGAATTTGGGTACGATCGATCCGGCCGCGAGGGTTGCGTTTGAGACGGGGCAGACAGATCCAGTCCG  
CGCTGCTCTCGTCGATCCGACGCTCATACTAGTGGTACCTATAGTTTTTTTCTCCTTGACGTTAAAGTAG  
AGGTATATTAACAATTTTTTTGTTGATACTTTTATGACATTTGAATAAGAAGTAATACAACTGAAAATGTT  
GAAAGTATTAGTTAAAGTGGTTATGCAGCTTTTTCCATTTATATATCTGTTAATAGATCAAAAATCATCGCT  
TCGCTGATTAATTACCCAGAAATAAGGCTAAAAAACTAATCGCATTATCATCCTATGGTTGTTAATTTGA  
TTCGTTAATTTGAAGTTTTGTGGGGCCAGGTTACTGCCAATTTTTCTCCTTATAACATAAAAAGCTAGTA  
TTGTAGAATCTTTATTGTTCCGGAGCAGTGCGGCGCGAGGCACATCTGCGTTTCAGGAACCGCACCGGTGAA  
GACGAGGACGCACGGTCTAGACTCCTCCGCCGCACTCCTCCGCCGCTCCTCCTCCGCCGCACTCCTCCGCC  
GCTCCTCCTCCGCCGCACTCCTCCGCCGCGGCCGCACTTCAATATAGCAATGAGCAGTTAAGCGTATTACT  
GAAAGTTCAAAGAGAAGGTTTTTTTTAGGCTAAGATAATGGGGCTCTTTACATTTCCACAACATATAAGTA  
AGATTAGATATGGATATGTATATGGATATGTATATGGTGGTAATGCCATGTAATATGATTATTA AACTTCT  
TTGCGTCCATCAAAAAAAGTAAGAATTTTTGAAAATTCATATAAAGATCTGTTTAGCTTGCCTCGTC  
CCC GCCGGGTACCCGGCCAGCGACATGGAGGCCAGAATAACCTCCTTGACAGTCTTGACGTGCGCAGCT  
CAGGGGCATGATGTGACTGTGCGCCGTACATTTAGCCATACATCCCATGTATAATCAATTTGCATCCATA  
CATTTTTGATGGCCGACGGCGCAAGCAAAAATTAAGGCTCCTCGCTGCAGACCTGCGAGCAGGGAAACGC  
TCCCTCACAGACGCGTTGAATTGTCCCACGCCGCGCCCTGTAGAGAAATATAAAGGTTAGGATTTGC  
CACTGAGGTTCTTTCTTTTATATACTTCTTTTTAAATCTTGCTAGGATACAGTTCTCACATCACATCCGAA  
CATAACAACCATGGGTAAGGAAAAGACTCACGTTTCGAGGCCGCGATTAAATTC AACATGGATGCTGAT  
TTATATGGGTATAAATGGGCTCGCGATAATGTGGGCAATCAGGTGCGACAATCTATCGATTGTATGGGAA  
GCCCGATGCGCCAGAGTTGTTTCTGAAACATGGCAAAGGTAGCGTTGCCAATGATGTTACAGATGAGATGG  
TCAGACTAAACTGGCTGACGGAATTTATGCCTCTTCCGACCATCAAGCATTATCCGTA CTCTGATGAT  
GCATGGTTACTCACCACTGCGATCCC GGCAAAAACAGCATTCCAGGTATTAGAAGAATATCCTGATT CAGG  
TGAAAATATTGTTGATGCGCTGGCAGTGTTCCTGCGCCGGTTGCATTTCGATTCTGTTTGTAAATTGCTCTT  
TTAACAGCGATCGCGTATTTTCGTCTCGCTCAGGCGCAATCACGAATGAATAACGGTTTGGTTGATGCGAGT  
GATTTTGTATGACGAGCGTAATGGCTGGCCTGTTGAACAAGTCTGGAAAGAAATGCATAAGCTTTTTGCCATT

CTCACCGGATTTCAGTCGTCCTCATGGTGATTTCTCACTTGATAACCTTATTTTTGACGAGGGGAAATTA  
TAGGTTGTATTGATGTTGGACGAGTCGGAATCGCAGACCGATAACCAGGATCTTGCCATCCTATGGA  
CTCGGTGAGTTTTCTCCTTCATTACAGAAACGGCTTTTTCAAAAATATGGTATTGATAATCCTGATATGAA  
TAAATTGCAGTTTTCAATTTGATGCTCGATGAGTTTTCTAATCAGTACTGACAATAAAAAGATTCTTGTTTT  
CAAGAACTTGTCAATTTGTATAGTTTTTTTTATATTGTAGTTGTTCTATTTTAATCAAATGTTAGCGTGATTT  
ATATTTTTTTTTCGCCTCGACATCATCTGCCAGATGCGAAGTTAAGTGCGCAGAAAAGTAATATCATGCGTC  
AATCGTATGTGAATGCTGGTCGCTATACTGCTGTGTCGATTTCGATACTAACGCCGCCATCCAGTTTAAACGAG  
CTCGAATTCGGTGCAGCGGATCGAGCAGTGTGATCACTACTGGACCGCGAGCTGTGCTGCGACCCGCTGA  
TATGCAGCTCCAGCTTTTGTCCCTTTAGTGAGGGTTAATTGCGCGCTTGGCGTAATCATGGTCATAGCTG  
TTTTCTGTGTGAAATTGTTATCCGCTCACAAATCCACACAACATACGAGCCGGAAGCATAAAGTGAAAGC  
CTGGGGTGCCTAATGAGTGAGCTAACTCACATTAATTGCGTTGCGCTCACTGCCCGCTTTCCAGTCGGGAA  
ACCTGTGCTGCCAGCTGCATTAATGAATCGGCCAACCGCGGGGAGAGGCGGTTTGCCTATTGGGCGCTCT  
TCCGCTTCCCTCGCTCACTGACTCGCTGCGCTCGGTCGTTCCGGCTGCGGCGAGCGGTATCAGCTCACTCAA  
GGCGGTAATACGGTTATCCACAGAATCAGGGGATAACGCAGGAAAGAATCATGTGAGCAAAAAGGCCAGCAA  
AGGCCAGGAACCGTAAAAAGGCCGCGTTGCTGGCGTTTTTCCATAGGCTCCGCCCCCTGACGAGCATCAC  
AAAAATCGACGCTCAAGTCAGAGGTGGCGAAACCCGACAGGACTATAAAGATACCAGGCGTTTTCCCTGG  
AAGCTCCCTCGTGCGCTCTCCTGTTCCGACCCCTGCCGCTTACCGGATACCTGTCCGCCTTTCTCCCTTCGG  
GAAGCGTGGCGCTTTCTCATAGCTCACGCTGTAGGTATCTCAGTTCGGTGTAGGTCGTTCCGCTCCAAGCTG  
GGCTGTGTGCACGAACCCCCGTTTCCAGCCCGACCGCTGCGCCTTATCCGGTAACTATCGTCTTGAGTCCAA  
CCCGTAAGACAGACTTATCGCCACTGGCAGCAGCCACTGGTAAACAGGATTAGCAGAGCGAGGTATGTAG  
CGGTTGCTACAGAGTTCTTGAAGTGGTGGCCTAACTACGGCTACACTAGAAGGACAGTATTTGGTATCTGC  
GCTCTGCTGAAGCCAGTTACCTTCGAAAAAGAGTTGGTAGCTCTTGATCCGGCAAAACAAACCACCGCTGG  
TAGCGGTGGTTTTTTTTGTTTGAAGCAGCAGATTACGCGCAGAAAAAAGGATCTCAAGAAGATCCTTTGA  
TCTTTTCTACGGGGTCTGACGCTCAGTGGAACGAAAACCTCACGTTAAGGGATTTTGGTCATGAGATTATCA  
AAAAGGATCTTACCTAGATCCTTTTAAATTAATAAATGAAGTTTTAAATCAATCTAAAGTATATATGAGTA  
AACTTGGTCTGACAGTTACCAATGCTTAATCAGTGAGGCACCTATCTCAGCGATCTGTCTATTTTCGTTT  
CCATAGTTGCTGACTCCCCGTCGTGTAGATAACTACGATACGGGAGGGCTTACCATCTGGCCCCAGTGCT  
GCAATGATACCGCGAGACCCACGCTCACCGGCTCCAGATTTATCAGCAATAAACAGCCAGCCGGAAGGGC  
CGAGCGCAGAAGTGGTCCTGCAACTTTATCCGCCTCCATCCAGTCTATTAATTGTTGCCGGGAAGCTAGAG  
TAAGTAGTTCGCCAGTTAATAGTTTTGCGCAACGTTGTTGCCATTGCTACAGGCATCGTGGTGTACGCTCG  
TCGTTTGGTATGGCTTCAATCAGCTCCGGTTCCTAACGATCAAGGCGAGTTACATGATCCCCATGTTGTG  
CAAAAAGCGGTTAGCTCCTTCGGTCCCTCCGATCGTTGTGAGAAGTAAGTTGGCCGAGTGTATCACTCA  
TGTTTATGGCAGCACTGCATAATTCTTACTGTATGCCATCCGTAAGATGCTTTTCTGTGACTGGTGAG  
TACTCAACCAAGTCATTCTGAGAATAGTGTATGCGGCGACCGAGTTGCTCTTGCCCGGCGTCAATACGGGA  
TAATACCGCGCCACATAGCAGAACTTTAAAGTGCTCATCATTGGAAAACGTTCTTCCGGGGCGAAAACCTCT  
CAAGGATCTTACCCTGTTGAGATCCAGTTTCGATGTAACCCACTCGTGCACCCAACTGATCTTTCAGCATCT  
TTTACTTTTACCAGCGTTTCTGGGTGAGCAAAAACAGGAAGGCAAAATGCCGCAAAAAGGGGAATAAGGGC  
GACACGGAAATGTTGAATACTCATACTCTTCTTTTTCAATATTATTGAAGCATTTATCAGGGTTATTGTC  
TCATGAGCGGATACATATTTGAATGTATTTAGAAAAATAAACAAATAGGGGTTCCGCGCACATTTCCCGA  
AAAGTGCCAC

### **B1H sequences for determining Z<sub>4</sub> binding motif**

The following sequences were recovered from the B1H procedure and used to identify the Z<sub>4</sub> recognition motif:

GCGGCGGAGGAG  
GCGGCGGAGGAG  
GCGGCTGAGGAG  
GCGGCGGAGCCG  
GCGGGTGAGGCG  
GCGGCGGAGGAG  
GCGGCGGCGGAG  
GCGGCGGAGGAG  
GCGGCTGAGACG  
GCGGCTGAGAAG  
GCGGCGGCGGCG  
GCGGCTGCGGAG  
GCGCCGGCGGAT  
GCGGCGGCGGAG  
GCGGCGGAGGCG  
GCGGCTGAGGCG  
GCGCCTGAGCAT  
GCGGCGGAGGAG  
GCGGGTGAGGCG  
GCGGCGGAGGCG

**Table S1:** Yeast strains constructed in this study.  
All strains are s288c with a repaired *HAP1* allele.

| Strains                      | Description                                                                                                                 |
|------------------------------|-----------------------------------------------------------------------------------------------------------------------------|
| <b>yMN1/DBY12098</b>         | ura3Δ, leu2Δ0::ACT1pr-GEV-NatMX, Matα                                                                                       |
| <b>yMN2/DBY12394</b>         | ura3Δ, leu2Δ0::ACT1pr-Z <sub>3</sub> EV-NatMX, Matα                                                                         |
| <b>yMN3/DBY12395</b>         | ura3Δ, leu2Δ0::ACT1pr-Z <sub>4</sub> EV-NatMX, Matα                                                                         |
| <b>yMN4</b>                  | yMN1+pMN1                                                                                                                   |
| <b>yMN5</b>                  | yMN1+ pMN2                                                                                                                  |
| <b>yMN6</b>                  | yMN2+ pMN1                                                                                                                  |
| <b>yMN7</b>                  | yMN2+ pMN3                                                                                                                  |
| <b>yMN8</b>                  | yMN2+ pMN4                                                                                                                  |
| <b>yMN9</b>                  | yMN2+ pMN5                                                                                                                  |
| <b>yMN10</b>                 | yMN2+ pMN6                                                                                                                  |
| <b>yMN11</b>                 | yMN2+ pMN7                                                                                                                  |
| <b>yMN13</b>                 | yMN3+ pMN1                                                                                                                  |
| <b>yMN14</b>                 | yMN3+ pMN8                                                                                                                  |
| <b>DBY12396</b>              | ura3Δ, leu2Δ0::ACT1pr-Z <sub>4</sub> EV-NatMX, can1Δ::Z <sub>4</sub> EVpr-GFP, Matα                                         |
| <b>DBY12397</b>              | leu2Δ0::ACT1pr-Z <sub>4</sub> EV-NatMX, Matα                                                                                |
| <b>DBY12398</b>              | leu2Δ0::ACT1pr-Z <sub>4</sub> EV-NatMX, Mata                                                                                |
| <b>DBY12399</b>              | ura3Δ, leu2Δ0::ACT1pr-Z <sub>4</sub> EV-NatMX, Mata                                                                         |
| <b>DBY12400</b>              | leu2Δ0::ACT1pr-Z <sub>3</sub> EV-NatMX, Mata                                                                                |
| <b>DBY12401</b>              | ura3Δ, leu2Δ0::ACT1pr-Z <sub>3</sub> EV-NatMX, Mata                                                                         |
| <b>DBY12402</b>              | ura3Δ, leu2Δ0::ACT1pr-Z <sub>3</sub> EV-NatMX, can1Δ::Z <sub>3</sub> EVpr-GFP, Matα                                         |
| <b>DBY12406</b>              | leu2Δ0::ACT1pr-Z <sub>3</sub> EV-NatMX, Matα                                                                                |
| <b>DBY12412</b>              | ura3Δ, leu2Δ0::ACT1pr-Z <sub>4</sub> EV-NatMX, KanMX-Z <sub>4</sub> EVpr-GCN4                                               |
| <b>DBY12416</b>              | leu2Δ0::ACT1pr-Z <sub>4</sub> EV-NatMX, ybr032wΔ::LEU2pr <sup>(-314 Δ -1)</sup> -LEU2, Matα                                 |
| <b>DBY12417</b>              | leu2Δ0::ACT1pr-Z <sub>4</sub> EV-NatMX, ybr032wΔ::LEU2pr <sup>(-314 Δ -1)</sup> -LEU2, Mata                                 |
| <b>DBY12418</b>              | leu2Δ0::ACT1pr-Z <sub>3</sub> EV-NatMX, ybr032wΔ::LEU2pr <sup>(-314 Δ -1)</sup> -LEU2, Mata                                 |
| <b>DBY12419</b>              | leu2Δ0::ACT1pr-Z <sub>3</sub> EV-NatMX, ybr032wΔ::LEU2pr <sup>(-314 Δ -1)</sup> -LEU2, Matα                                 |
| <b>DBY12423/<br/>yRSM257</b> | leu2Δ0::ACT1pr-Z <sub>4</sub> EV-NatMX, ybr032wΔ::LEU2pr <sup>(-314 Δ -1)</sup> -LEU2, KanMX-Z <sub>4</sub> EVpr-GCN4, Matα |



**Table S2:** Plasmids used in this study.

| Plasmid      | reporter | Promoter                  | Binding site | Marker      | Notes:                               |
|--------------|----------|---------------------------|--------------|-------------|--------------------------------------|
| <b>pMN1</b>  | Gfp      | -                         | -            | <i>URA3</i> | empty vector                         |
| <b>pMN2</b>  | Gfp      | Modified GAL1             | CGG-N11-GCC  | <i>URA3</i> |                                      |
| <b>pMN3</b>  | Gfp      | Modified GAL1             | GCGTGGGCG    | <i>URA3</i> | wt                                   |
| <b>pMN4</b>  | Gfp      | Modified GAL1             | GCGTGGGTG    | <i>URA3</i> | 2-fold less affinity                 |
| <b>pMN5</b>  | Gfp      | Modified GAL1             | GCGTGGGAG    | <i>URA3</i> | 5-fold less affinity                 |
| <b>pMN6</b>  | Gfp      | Modified GAL1             | GCGTGGGCC    | <i>URA3</i> | 9-fold less affinity                 |
| <b>pMN7</b>  | Gfp      | Modified GAL1             | GCGTGGGGG    | <i>URA3</i> | 20-fold less affinity                |
| <b>pMN8</b>  | Gfp      | Modified GAL1             | GCGGCGGAGGAG | <i>URA3</i> | -                                    |
| <b>pMN9</b>  | -        | KanMX-Z <sub>3</sub> EVpr | -            |             | For making inducible genomic alleles |
| <b>pMN10</b> | -        | KanMX-Z <sub>4</sub> EVpr | -            |             | For making inducible genomic alleles |

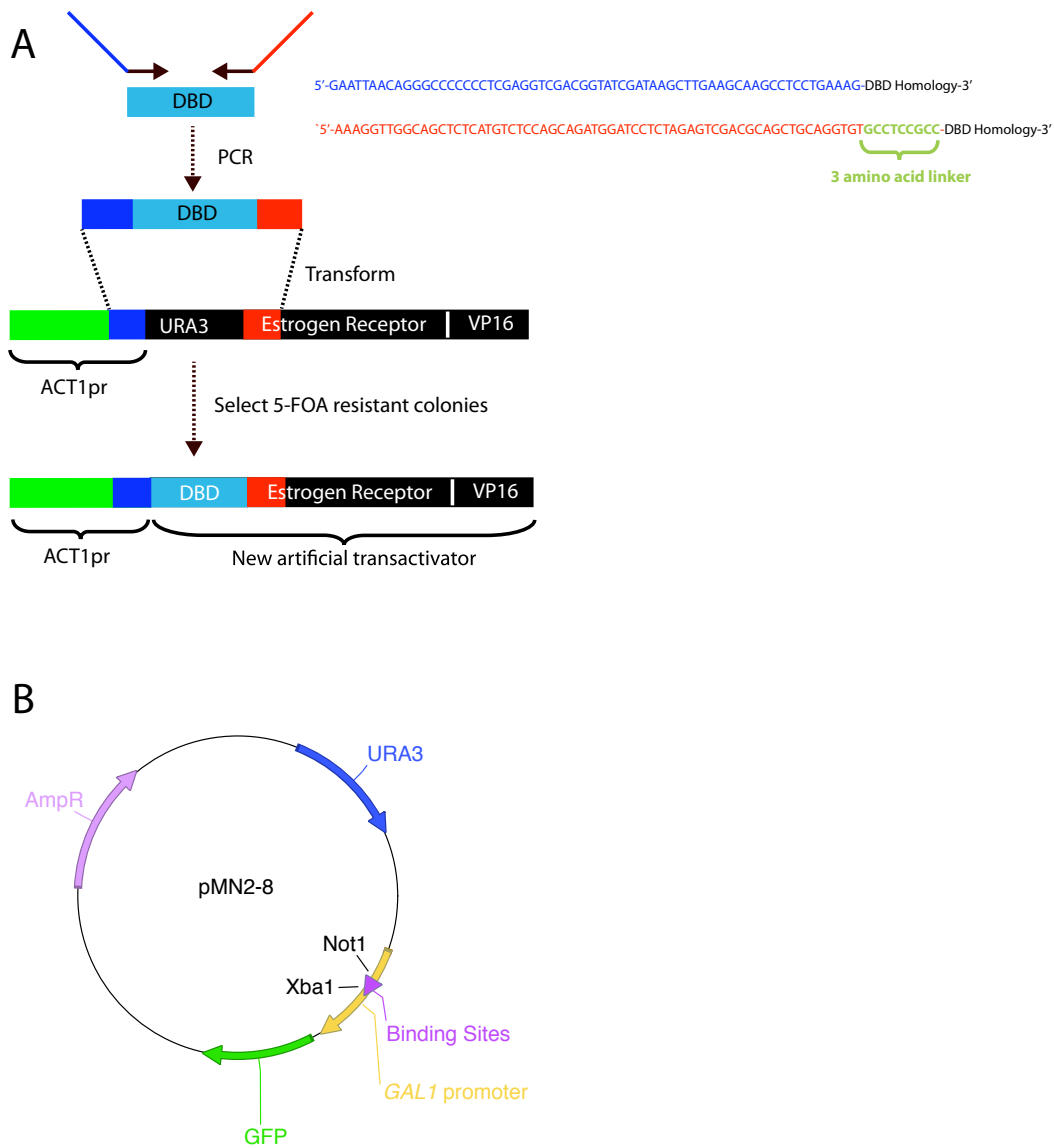

**Figure S1:** (A) To construct Z<sub>3</sub>EV and Z<sub>4</sub>EV, the Gal4 DNA binding domain of a chromosomally integrated GEV was replaced with *URA3*. DBDs (Zif268 and Z<sub>4</sub> array) were PCR amplified with homology to the ACT1 promoter (blue) and estrogen receptor (red). Linear PCR fragments were transformed into yeast, which were selected on 5-FOA. Successful transformants were confirmed by PCR. (B) Schematic of reporter plasmids pMN2-8. pMN1 contains GFP but not the *GAL1* promoter.

## Binding Site Selection by Bacterial one-hybrid Assay

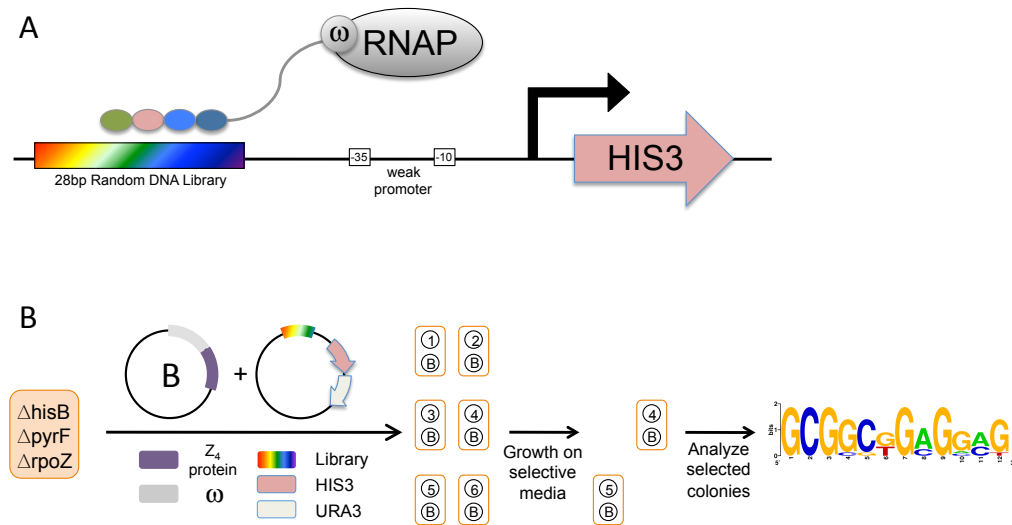

**Figure S2:** Binding site selection by bacterial one-hybrid assay. (A) Cartoon of reporter activation in B1H system. Here a 4-fingered protein, where each finger is depicted as a different color oval, is expressed as a fusion to the omega subunit of RNA polymerase. If the protein is able to bind a sequence in the library (rainbow box) upstream of the promoter that regulates the *HIS3* gene, it will recruit RNAP and activate the reporter. When grown on selective media, functional protein-DNA interactions can be assayed by screening for survival on media lacking histidine. (B) In practice, the  $Z_4$  expression vector and the library reporter vector are transformed into a selection compatible *E. coli* strain. Transformants are plated on selective media. Those that survive are sequenced in the library window and MEME is used to recover an over represented motif that represents the DNA-binding specificity of the protein, which we have depicted as a sequence logo.

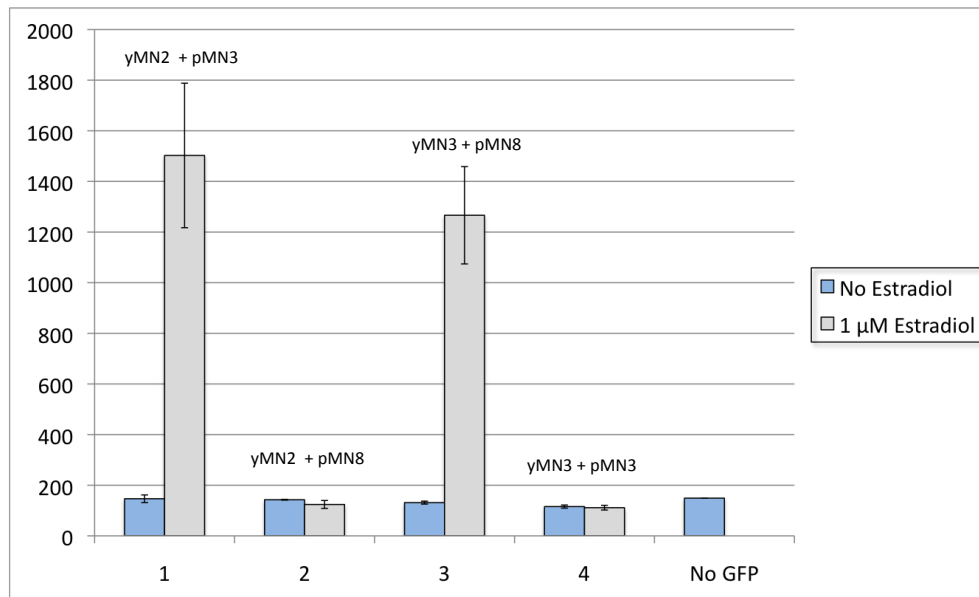

**Figure S3:** There is no crosstalk between Z<sub>3</sub>EV and Z<sub>4</sub>EV. Strains contain either Z<sub>3</sub>EV (labeled 1 and 2; strain = yMN2) or Z<sub>4</sub>EV (labeled 3 and 4; strain = yMN3). Strains contain either plasmid pMN3 (containing the Z<sub>3</sub>EV-GFP reporter) or pMN8 (containing Z<sub>4</sub>EV-GFP reporter). (1) yMN2 + pMN3. (2) yMN2 + pMN8. (3) yMN3 + pMN8. (4) yMN3 + pMN3. A yeast strain lacking GFP is shown to the right as a negative control. Cultures were grown to mid-log phase in SC-URA and then 1  $\mu$ M  $\beta$ -estradiol was added to the medium. Following 12 hours of induction, the mean and standard deviation of three replicates was quantified by flow cytometry.

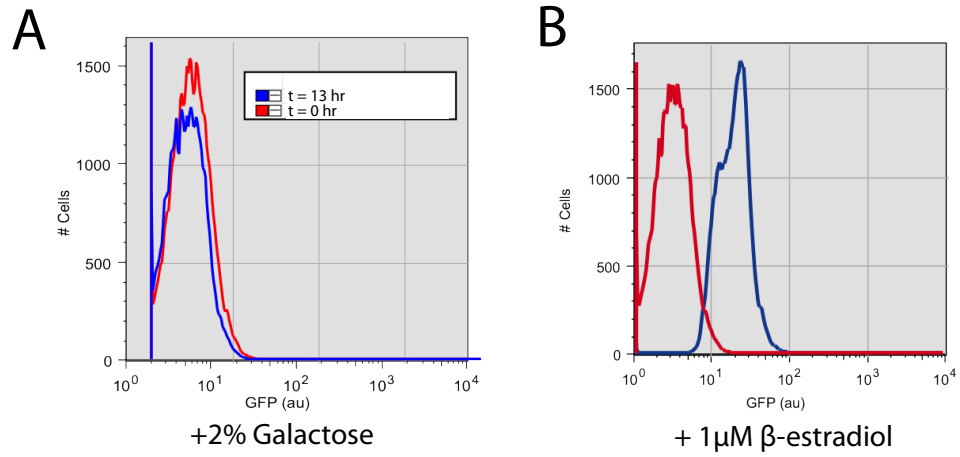

**Figure S4:** The Z<sub>4</sub>EV responsive promoter is not induced by Gal4p. DBY12396 was grown to early-log phase in rich medium with 2% raffinose as a carbon source. Growth medium was then supplemented with either (A) 2% galactose or (B) 1  $\mu$ M  $\beta$ -estradiol for 12 hours.

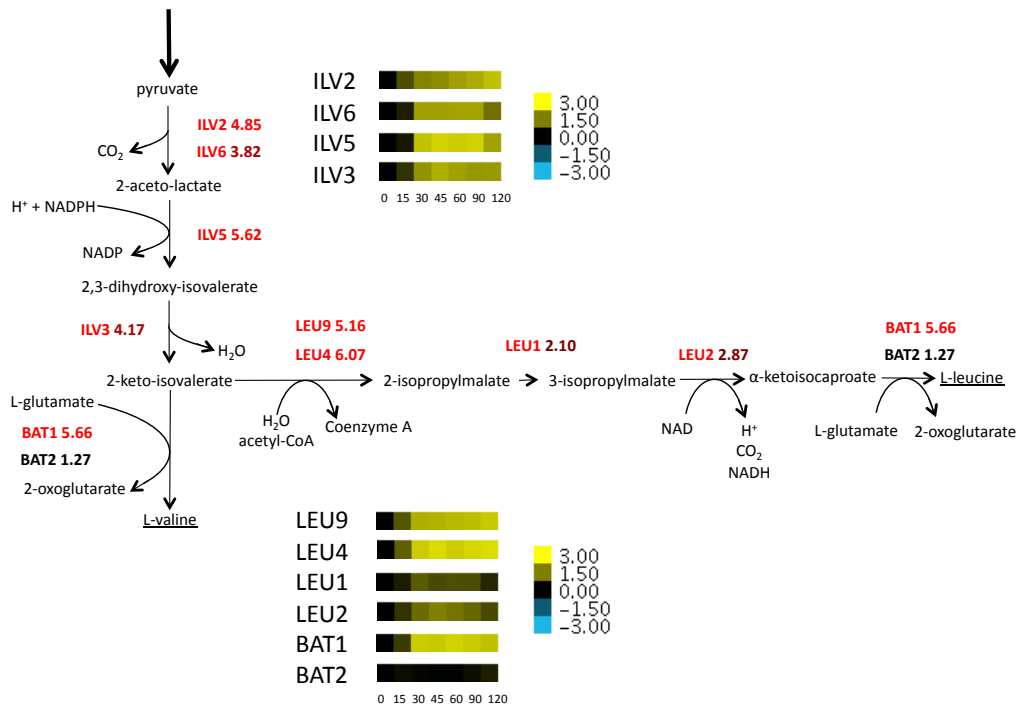

**Figure S5:** The transcriptional response of leucine and valine biosynthesis genes to Gcn4p induction. The maximum fold-change in expression is indicated next to each gene. The heatmap colorbar is in units of log<sub>2</sub> fold-change in expression.

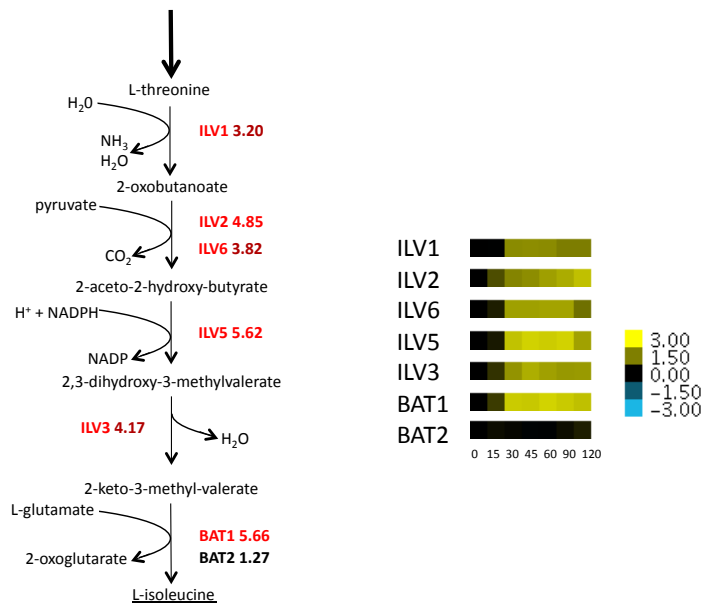

**Figure S6:** The transcriptional response of isoleucine biosynthesis genes to Gcn4p induction. The maximum fold-change in expression is indicated next to each gene. The heatmap colorbar is in units of log<sub>2</sub> fold-change in expression.

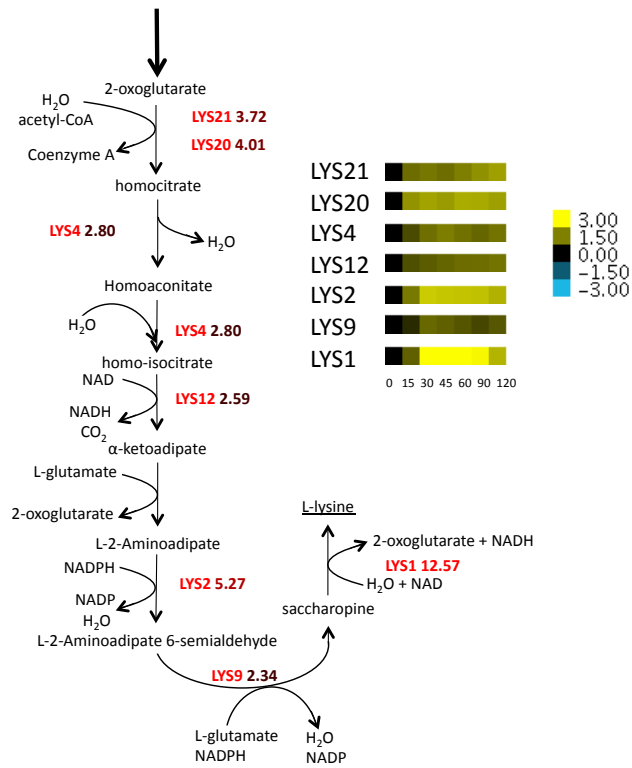

**Figure S7:** The transcriptional response of lysine biosynthesis genes to Gcn4p induction. The maximum fold-change in expression is indicated next to each gene. The heatmap colorbar is in units of log<sub>2</sub> fold-change in expression.



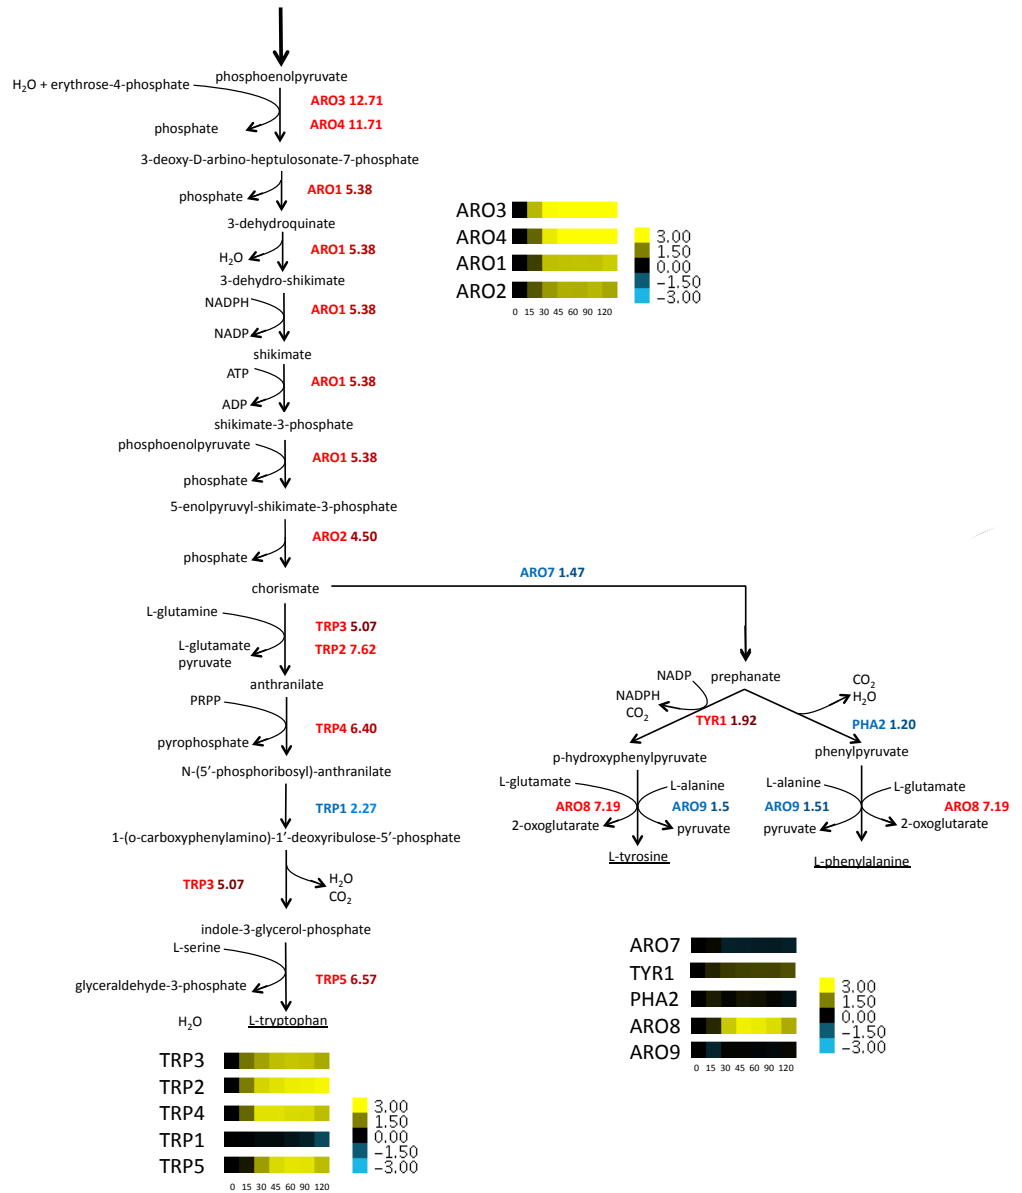

**Figure S8:** The transcriptional response of tryptophan, phenylalanine, and tyrosine biosynthesis genes to Gcn4p induction. The maximum fold-change in expression is indicated next to each gene. The heatmap colorbar is in units of log<sub>2</sub> fold-change in expression.

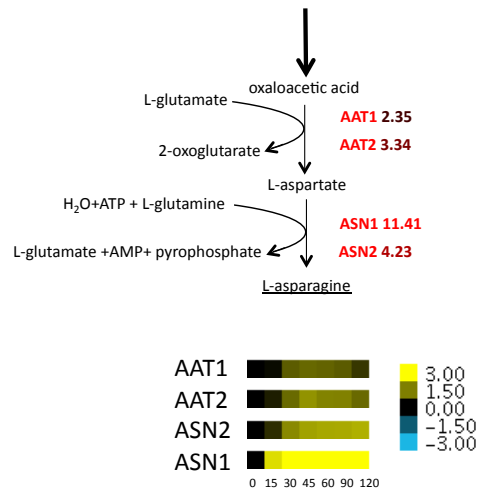

**Figure S9:** The transcriptional response of asparagine biosynthesis genes to Gcn4p induction. The maximum fold-change in expression is indicated next to each gene. The heatmap colorbar is in units of log<sub>2</sub> fold-change in expression.

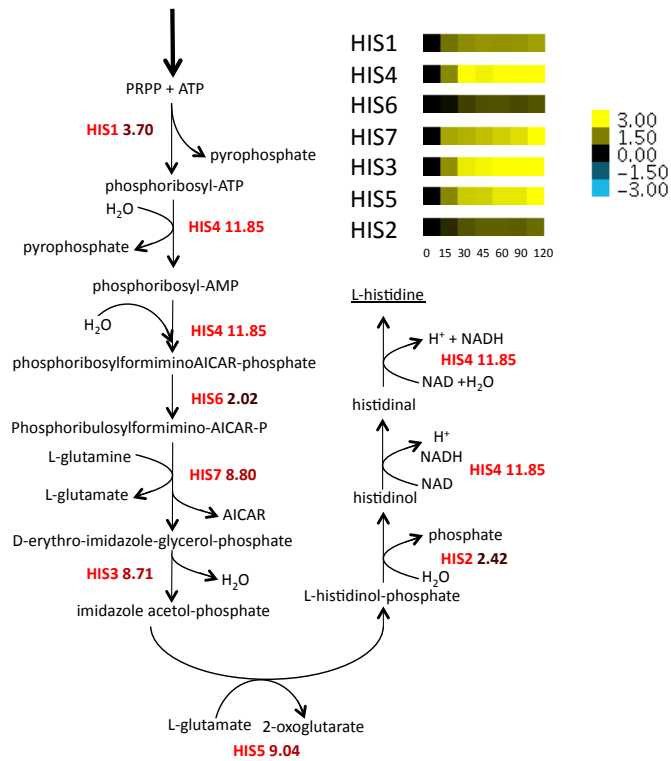

**Figure S10:** The transcriptional response of histidine biosynthesis genes to Gcn4p induction. The maximum fold-change in expression is indicated next to each gene. The heatmap colorbar is in units of log<sub>2</sub> fold-change in expression.

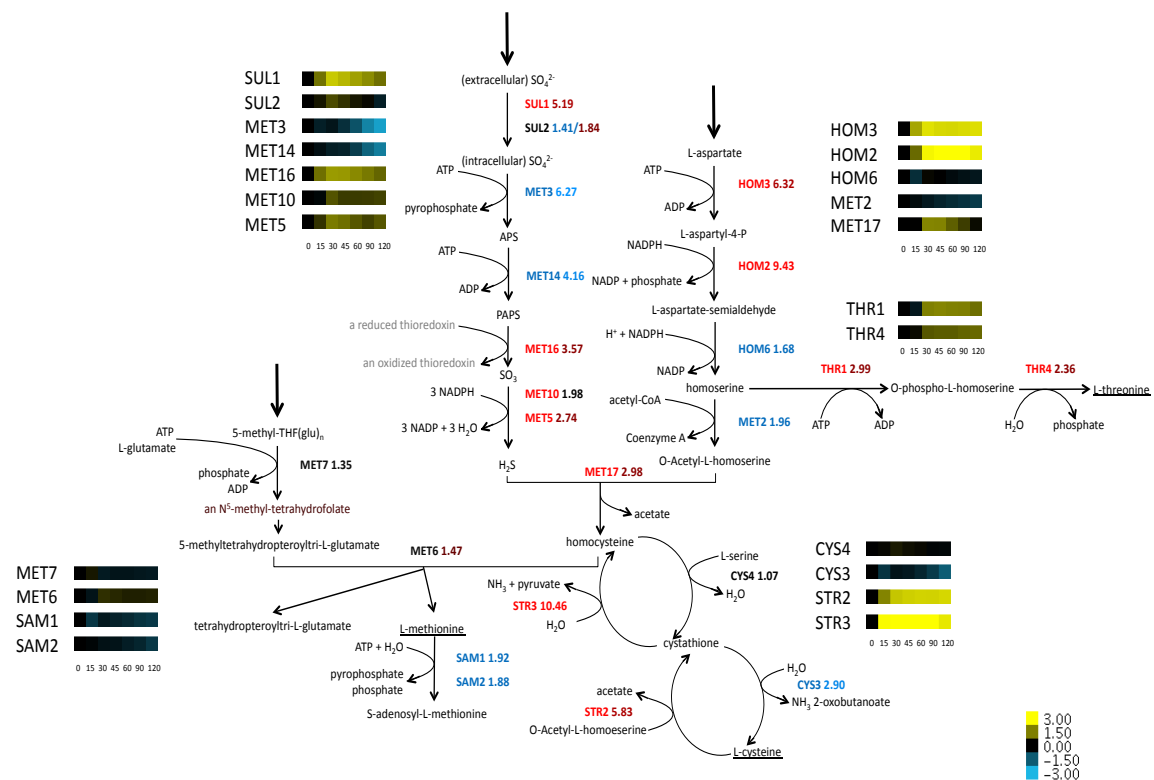

**Figure S11:** The transcriptional response of methionine and cysteine biosynthesis genes to Gcn4p induction. The maximum fold-change in expression is indicated next to each gene. The heatmap colorbar is in units of log<sub>2</sub> fold-change in expression.

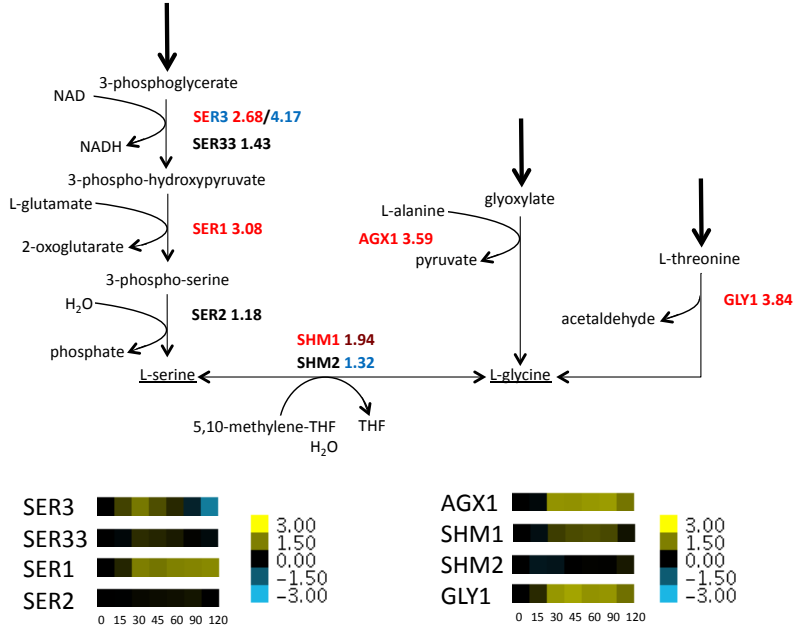

**Figure S12:** The transcriptional response of serine and glycine biosynthesis genes to Gcn4p induction. The maximum fold-change in expression is indicated next to each gene. The heatmap colorbar is in units of log<sub>2</sub> fold-change in expression.

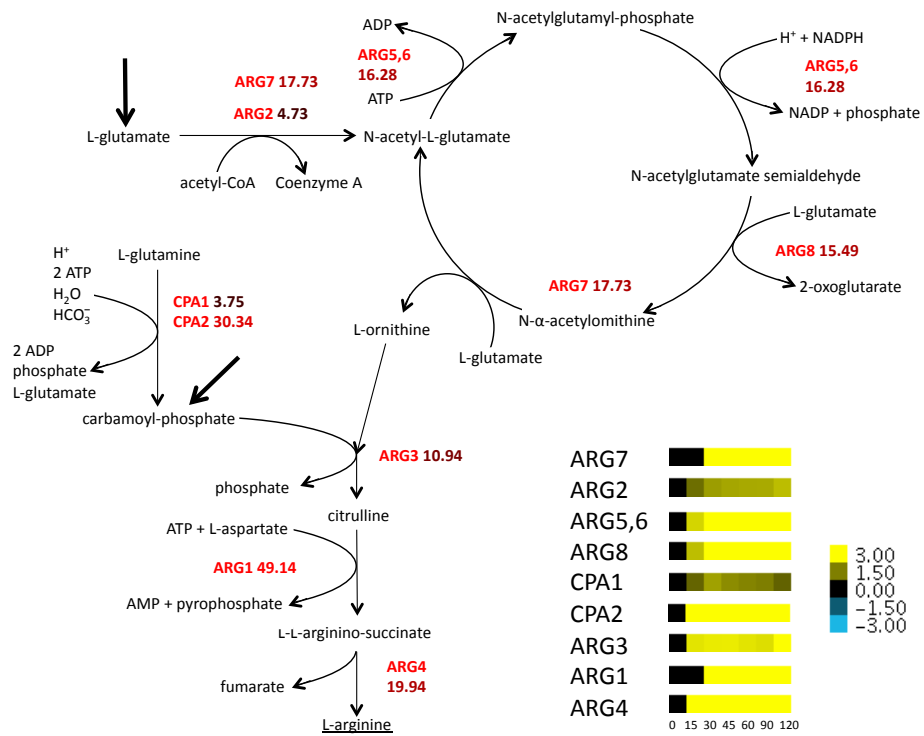

**Figure S13:** The transcriptional response of arginine biosynthesis genes to Gcn4p induction. The maximum fold-change in expression is indicated next to each gene. The heatmap colorbar is in units of  $\log_2$  fold-change in expression.

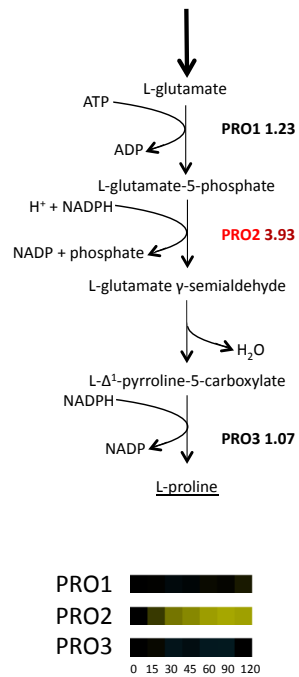

**Figure S14:** The transcriptional response of proline biosynthesis genes to Gcn4p induction. The maximum fold-change in expression is indicated next to each gene. The heatmap colorbar is in units of log<sub>2</sub> fold-change in expression.

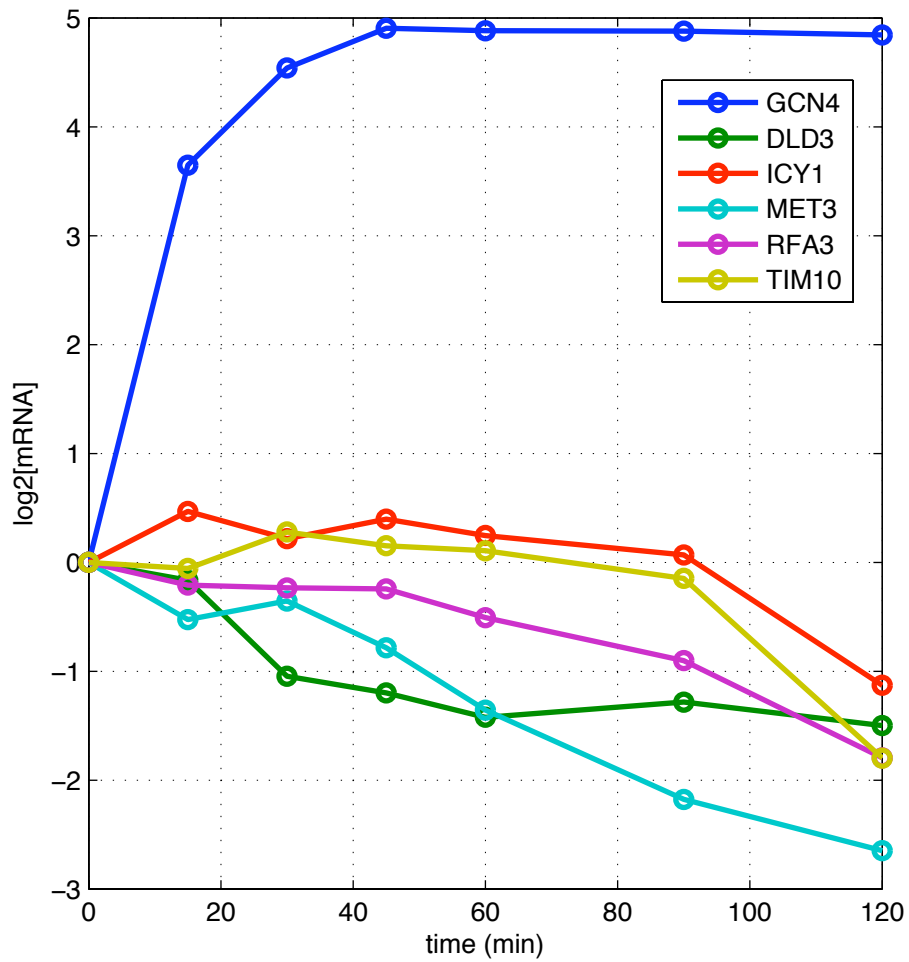

**Figure S15:** Transcriptional response of 5 previously determined Gcn4p targets (Maclsaac *et al*; p-value < 0.005) that are repressed >2-fold at 120 minutes in response to Gcn4p induction.



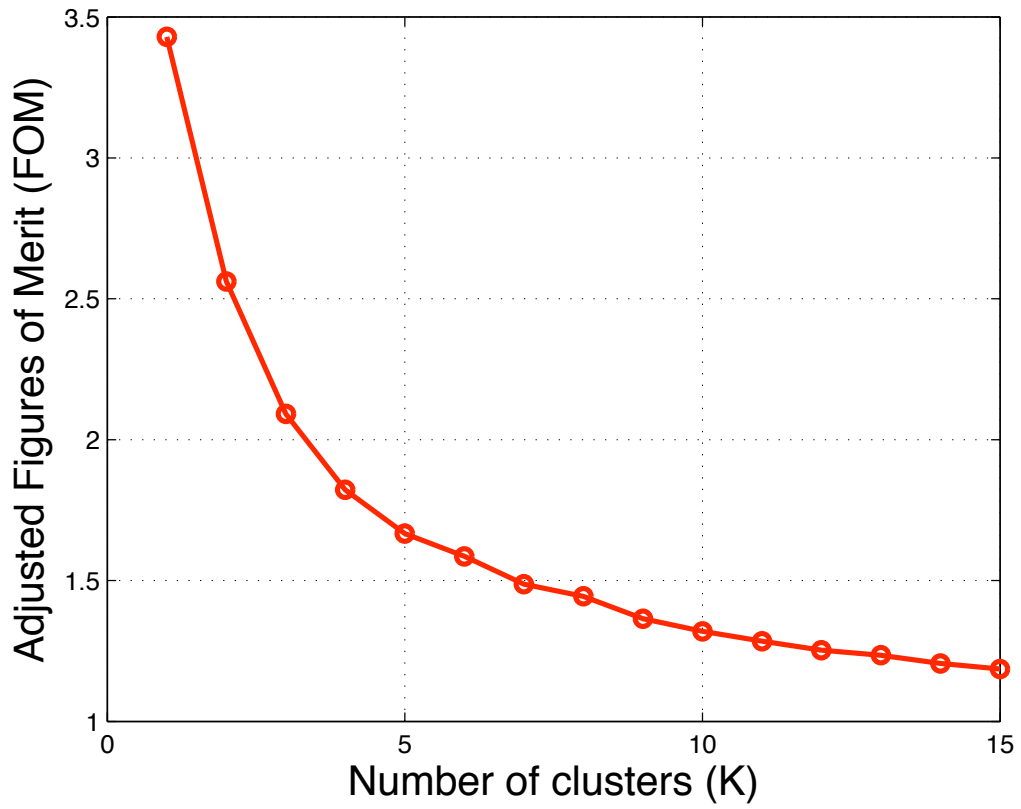

**Figure S16:** Figures of merit analysis of gene expression data in Figure 7D.
